# Supplementary material for: Assessment of the Relationship Between Ambient Temperature and Home Blood Pressure in Patients From a Web-Based Synchronous Telehealth Care Program: Retrospective Study
Source: PubMed Central journal article supplement (PMC6421515; doi:10.2196/12369), 2019-03-04
Supplement: jmir_v21i3e12369_app2.pdf [file jmir_v21i3e12369_app2.pdf]

**Multivariate analysis of predictors for mean blood pressure (MBP) by fitting a multiple linear regression model with the stepwise variable selection method**

| Covariate                                                                                                           | Parameter Estimate | Standard Error | t Value  | Pr >  t |
|---------------------------------------------------------------------------------------------------------------------|--------------------|----------------|----------|---------|
| Intercept                                                                                                           | 114.9281           | 0.2331         | 493.0257 | <0.0001 |
| Age ≤ 57.981 years                                                                                                  | -2.8962            | 0.1361         | -21.2771 | <0.0001 |
| 57.981 years < Age ≤ 73.824 years                                                                                   | 0.8255             | 0.0993         | 8.3129   | <0.0001 |
| Male                                                                                                                | 0.4930             | 0.0941         | 5.2377   | <0.0001 |
| CAD without MI vs. No CAD                                                                                           | 1.2647             | 0.0878         | 14.3996  | <0.0001 |
| CAD with MI vs. No CAD                                                                                              | -1.0178            | 0.1357         | -7.4988  | <0.0001 |
| CHF                                                                                                                 | -3.0234            | 0.0960         | -31.5033 | <0.0001 |
| CVA                                                                                                                 | 1.9922             | 0.1060         | 18.7872  | <0.0001 |
| PAD                                                                                                                 | -1.8266            | 0.1511         | -12.0916 | <0.0001 |
| Cancer                                                                                                              | 2.4246             | 0.1114         | 21.7619  | <0.0001 |
| Hourly averaged temperature <sup>1</sup> (°C)                                                                       | -0.5492            | 0.0090         | -61.0805 | <0.0001 |
| Hypertension × Hourly averaged temperature <sup>1</sup> (°C)                                                        | 0.1286             | 0.0036         | 35.3920  | <0.0001 |
| Diabetes × Hourly averaged temperature <sup>1</sup> (°C)                                                            | 0.1452             | 0.0036         | 40.0787  | <0.0001 |
| Temperature difference between the maximum and minimum in the 12 hours prior to blood pressure measurement (°C)     | 0.0612             | 0.0182         | 3.3678   | 0.0008  |
| Hourly averaged relative humidity <sup>1</sup> ≤ 61.432% or Hourly averaged relative humidity <sup>1</sup> > 81.51% | 0.5791             | 0.0796         | 7.2714   | <0.0001 |
| 2.046 m/s < Hourly averaged wind speed <sup>1</sup> ≤ 7.313 m/s                                                     | 0.4034             | 0.0761         | 5.2978   | <0.0001 |
| Number of categories of used antihypertensive drugs <sup>2</sup>                                                    | 0.2263             | 0.1014         | 2.2328   | 0.0256  |
| ACEI <sup>2</sup> × Hourly averaged temperature <sup>1</sup> (°C)                                                   | 0.0345             | 0.0124         | 2.7798   | 0.0054  |
| ARB <sup>2</sup> × Hourly averaged temperature <sup>1</sup> (°C)                                                    | 0.1404             | 0.0060         | 23.5586  | <0.0001 |
| ARB <sup>2</sup> × AB <sup>2</sup>                                                                                  | 6.6573             | 0.3368         | 19.7689  | <0.0001 |
| ARB <sup>2</sup> × BB <sup>2</sup>                                                                                  | 3.6949             | 0.1902         | 19.4305  | <0.0001 |
| ARB <sup>2</sup> × CCB <sup>2</sup>                                                                                 | -4.6539            | 0.1801         | -25.8340 | <0.0001 |
| ARB <sup>2</sup> × Diuretics <sup>2</sup>                                                                           | -1.7671            | 0.1688         | -10.4674 | <0.0001 |

|                                                                        |         |        |          |         |
|------------------------------------------------------------------------|---------|--------|----------|---------|
| CCB <sup>2</sup> × Hourly averaged temperature <sup>1</sup> (°C)       | 0.0432  | 0.0070 | 6.2002   | <0.0001 |
| CCB <sup>2</sup> × AB <sup>2</sup>                                     | -5.8290 | 0.3102 | -18.7928 | <0.0001 |
| CCB <sup>2</sup> × ACEI <sup>2</sup>                                   | -6.7877 | 0.9862 | -6.8827  | <0.0001 |
| CCB <sup>2</sup> × BB <sup>2</sup>                                     | -2.1052 | 0.2351 | -8.9546  | <0.0001 |
| CCB <sup>2</sup> × Diuretics <sup>2</sup>                              | 1.5916  | 0.1784 | 8.9233   | <0.0001 |
| Diuretics <sup>2</sup> × Hourly averaged temperature <sup>1</sup> (°C) | -0.0433 | 0.0060 | -7.2314  | <0.0001 |
| Diuretics <sup>2</sup> × AB <sup>2</sup>                               | 2.2120  | 0.2514 | 8.7989   | <0.0001 |
| Diuretics <sup>2</sup> × ACEI <sup>2</sup>                             | 1.4163  | 0.4620 | 3.0656   | 0.0022  |

<sup>1</sup> Hourly averaged temperature, hourly averaged relative humidity, and hourly averaged wind speed were the readings within the *hour* of blood pressure measurement so vary over time.

<sup>2</sup> Daily use of any of the following six categories of antihypertensive drugs, angiotensin converting enzyme inhibitors (ACEI), angiotensin receptor blockers (ARB), calcium-channel blockers (CCB), alpha-blockers (AB), beta-blockers (BB), and diuretics, were recorded and counted for all 253 patients. The listed antihypertensive drugs were those taken on the *day* of blood pressure measurement, so may vary over time.
